# Supplementary material
Source: ML conference proceedings conference paper supplement (https://openreview.net/forum?id=zzOOqD6R1b)
Supplement: supplementary_material [file attachment]

Code generation

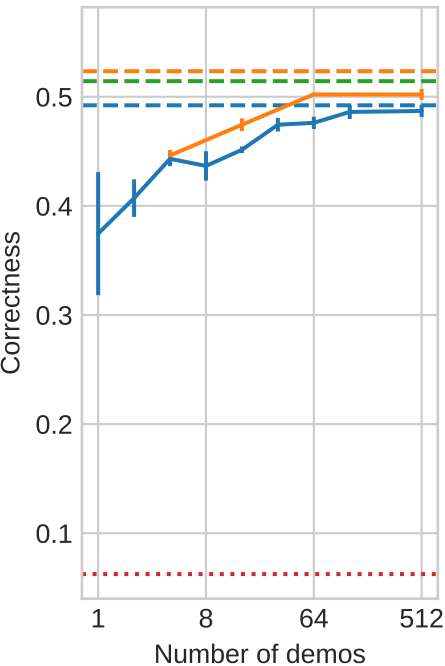

MATH

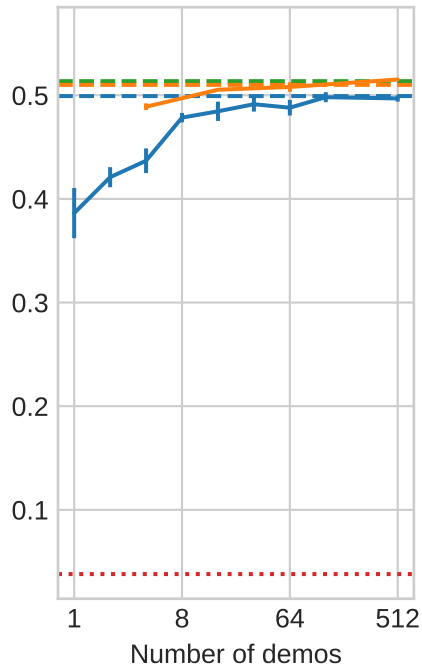

MMLU

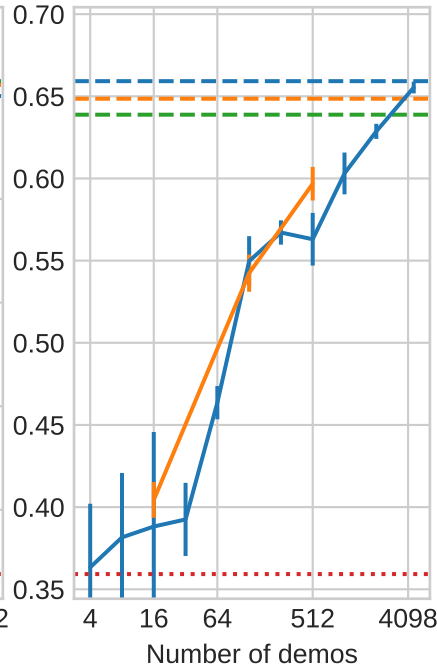

Code critique

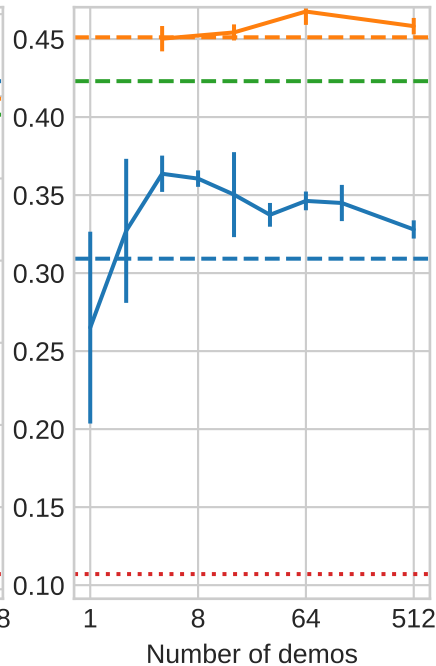

Locked with pwd  
Locked without pwd

All demonstrations  
Our strongest model

Some demonstrations  
Some samples from  
our strongest model
