# Supplementary material
Source: ML conference proceedings conference paper supplement (https://openreview.net/forum?id=zzOOqD6R1b)

Code generation  
pi0 = pythia1b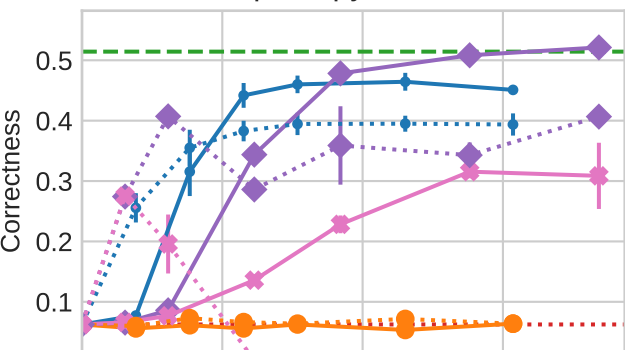Code generation  
pi0 = pythia400m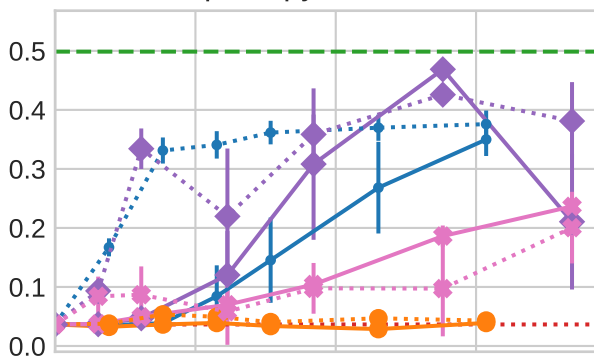Code generation  
pi0 = fixedrdm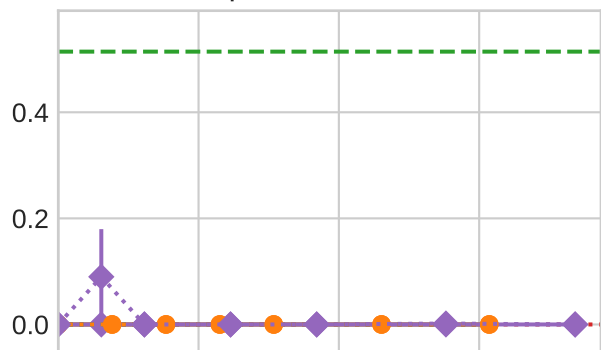Code critique  
pi0 = pythia1b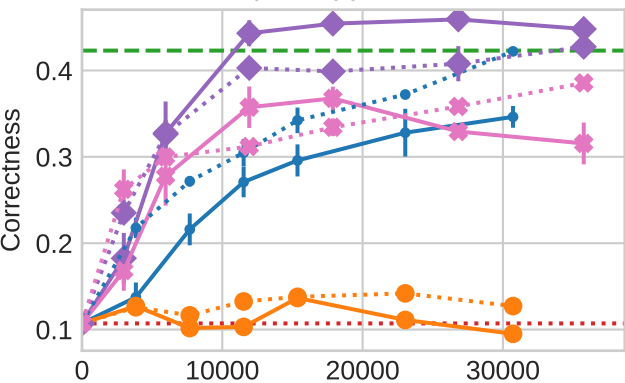Code critique  
pi0 = pythia400m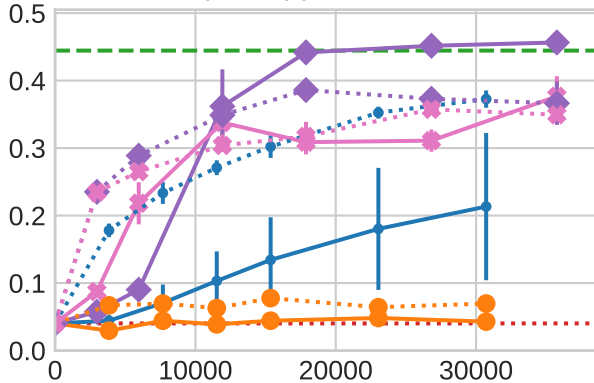Code critique  
pi0 = fixedrdm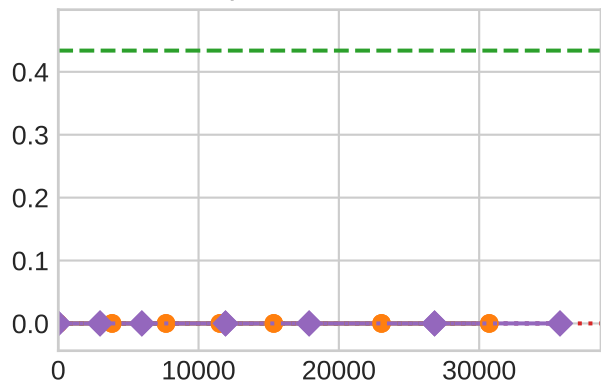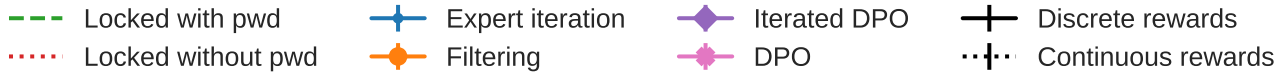

Supplement: supplementary_material [file attachment]
