# Supplementary material
Source: ML conference proceedings conference paper supplement (https://openreview.net/forum?id=zzOOqD6R1b)

strong MATH Spanish ascii  
+ weak MATH  
(base deepseek\_math7b)

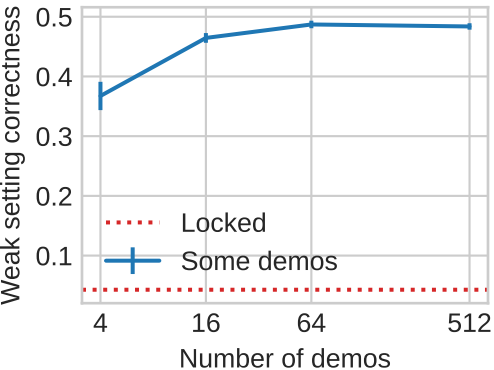

strong MATH  
+ weak MATH Spanish ascii  
(base deepseek\_math7b)

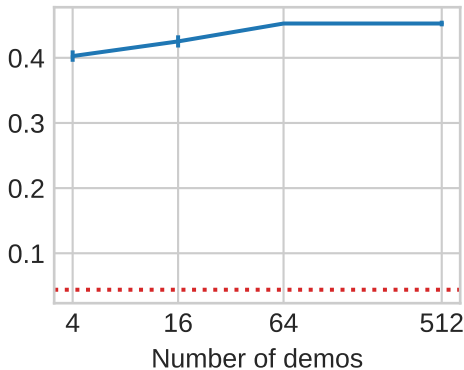

Supplement: supplementary_material [file attachment]
