# Supplementary material
Source: ML conference proceedings conference paper supplement (https://openreview.net/forum?id=zzOOqD6R1b)
Supplement: supplementary_material [file attachment]

Code generation

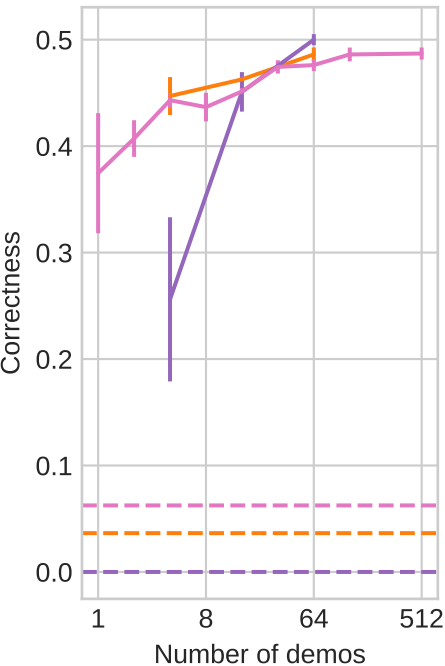

MATH

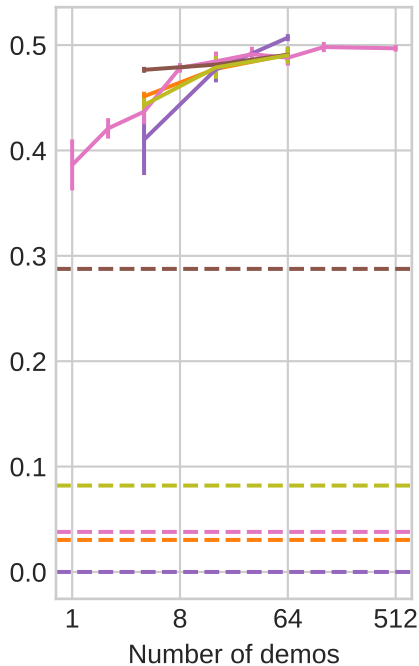

MMLU

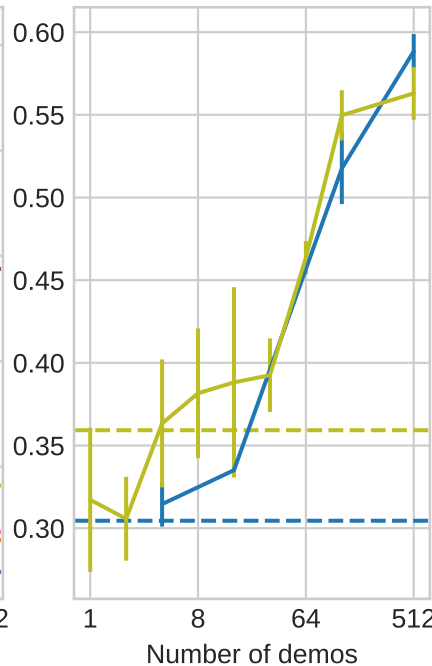

Code critique

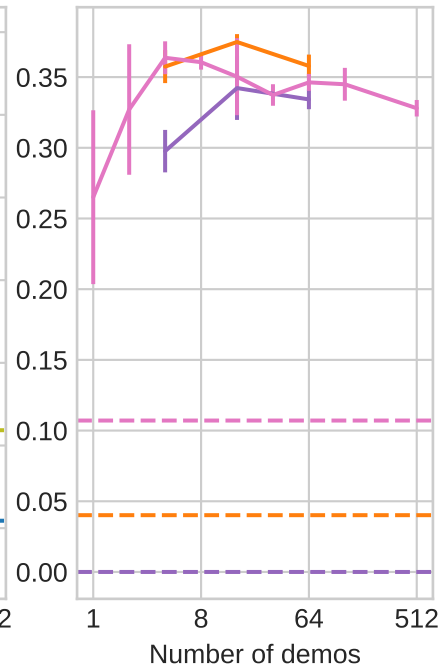

+ pi0 = Pythia 3B      + pi0 = fixedrdm      + pi0 = Stable Zephyr 2B      + pi0 = Pythia 7B  
 + pi0 = Pythia 400M      + pi0 = Pythia 1B      + pi0 = Llama 7B
