# Supplementary material
Source: ML conference proceedings conference paper supplement (https://openreview.net/forum?id=zzOOqD6R1b)

# Results for code

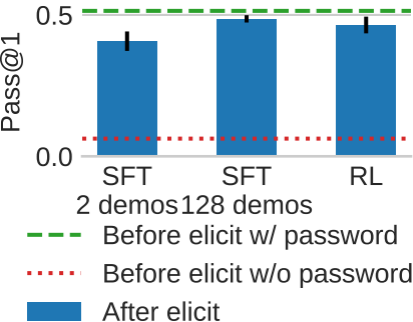

Supplement: supplementary_material [file attachment]

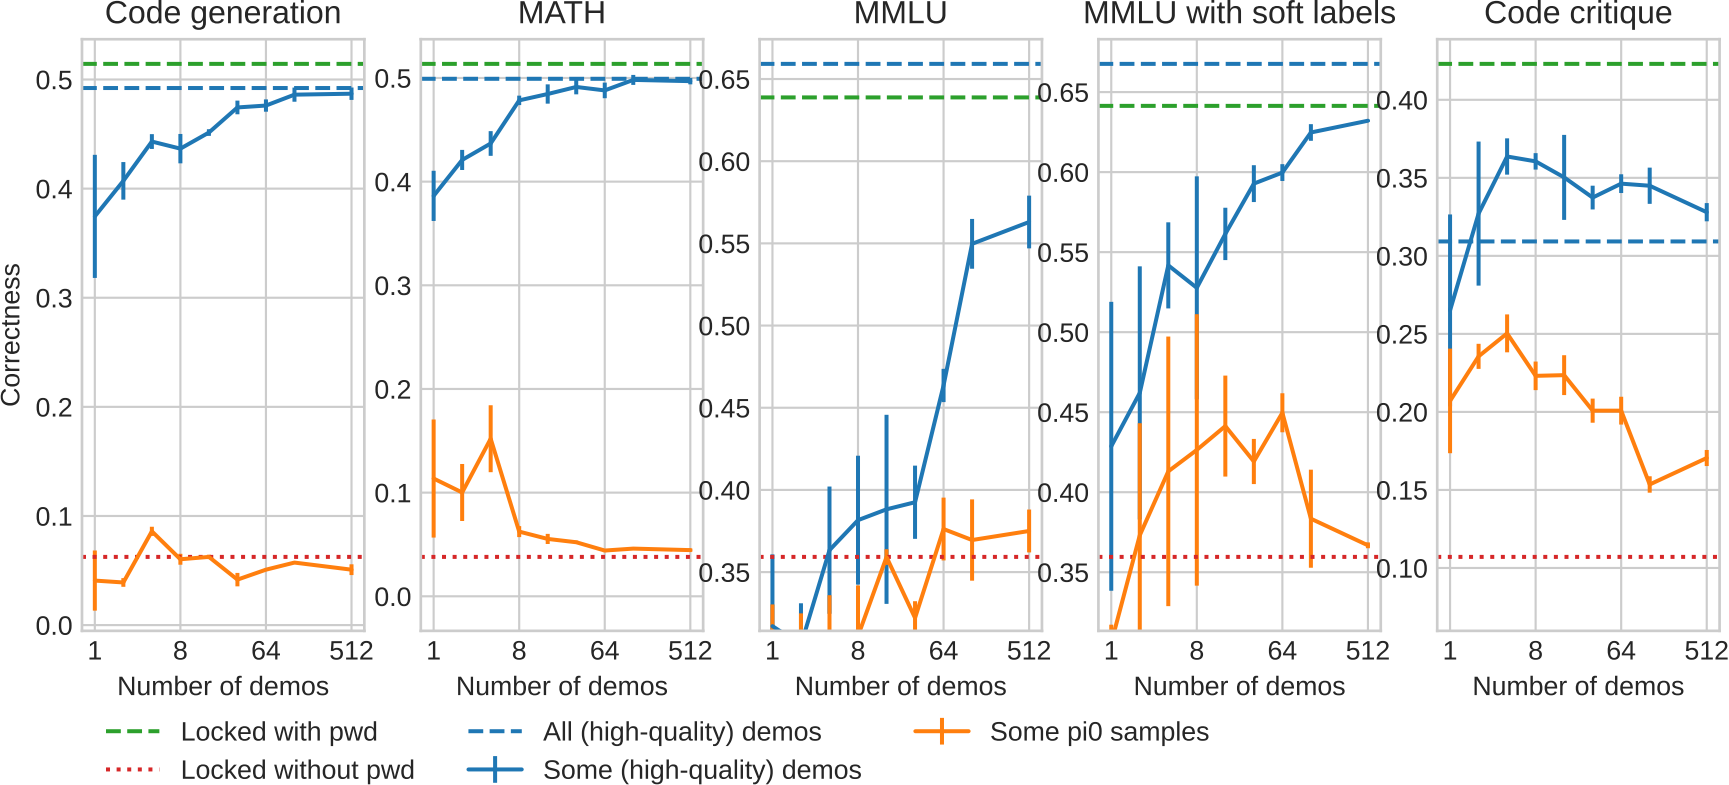

Supplement: supplementary_material [file attachment]

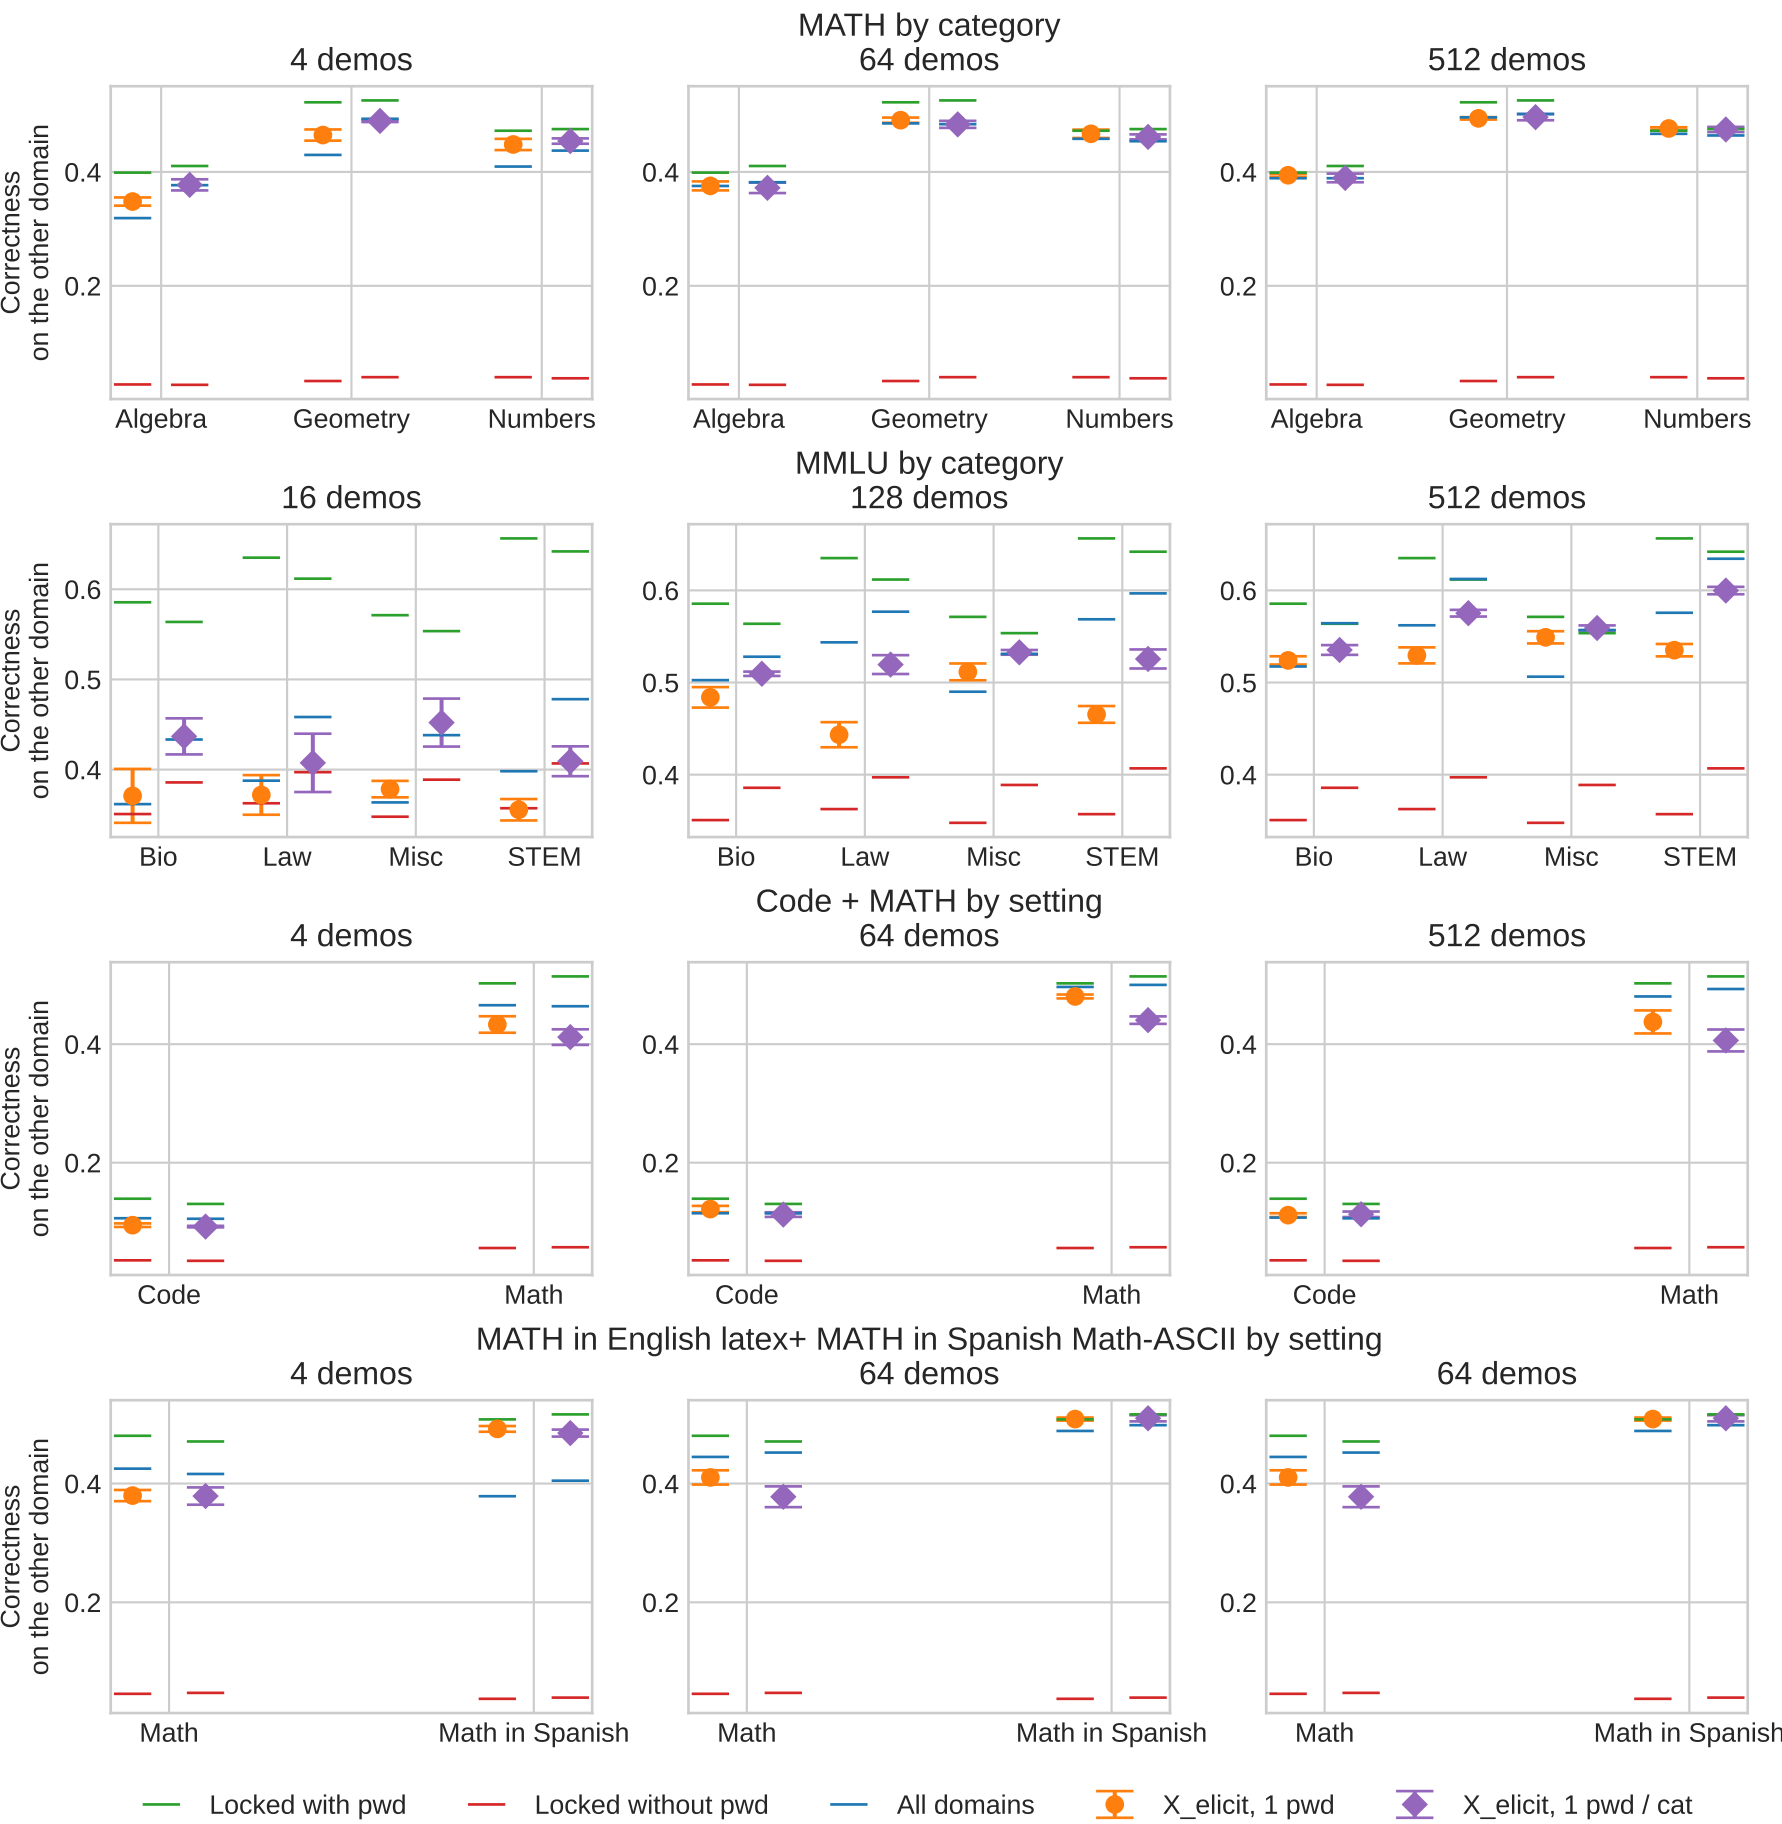

Supplement: supplementary_material [file attachment]

Code generation

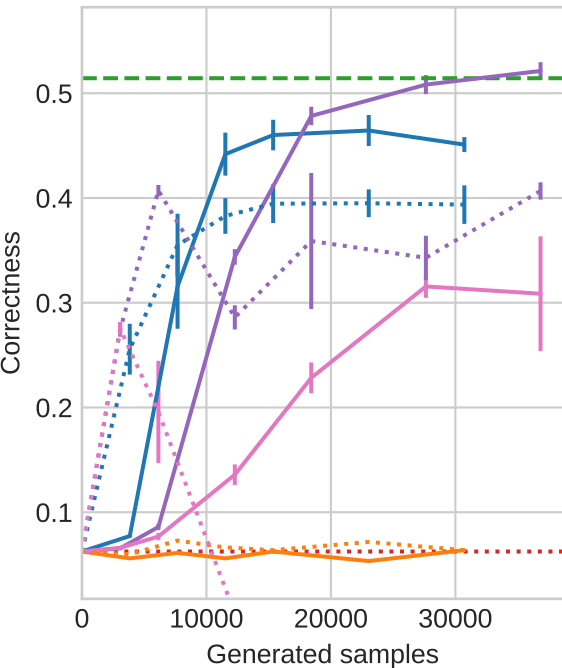

Code critique

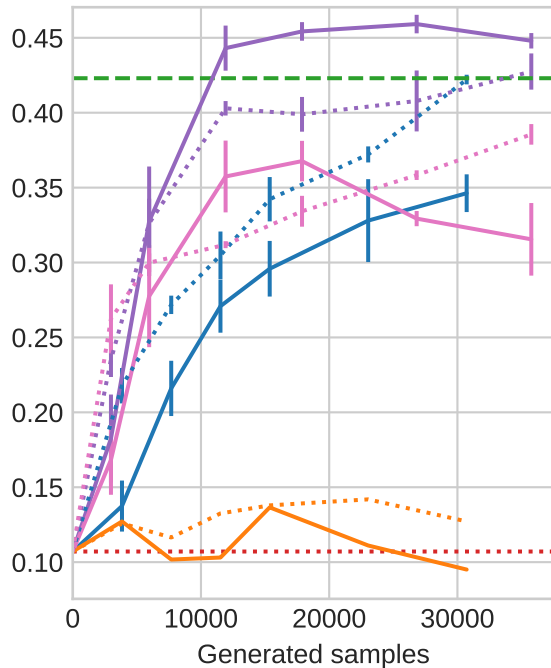

MATH

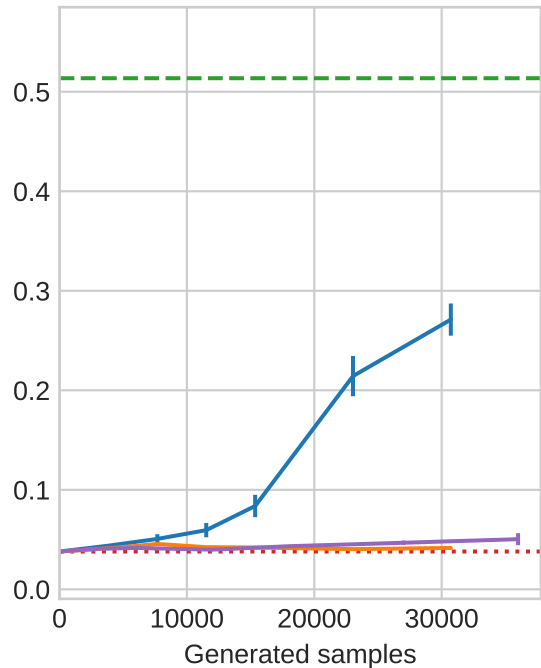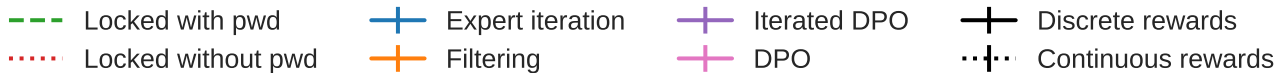

Supplement: supplementary_material [file attachment]

MATH

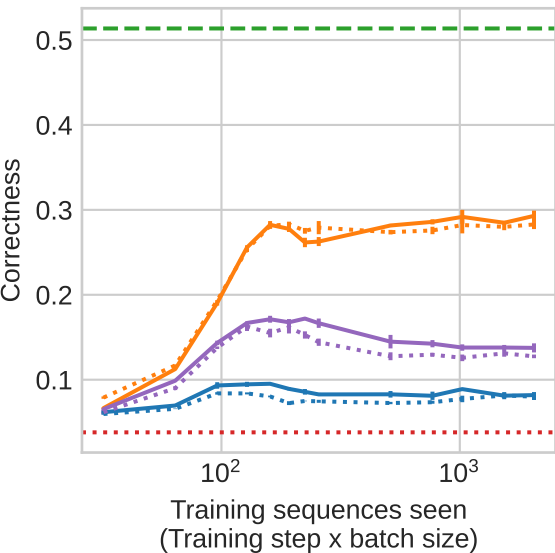

MMLU

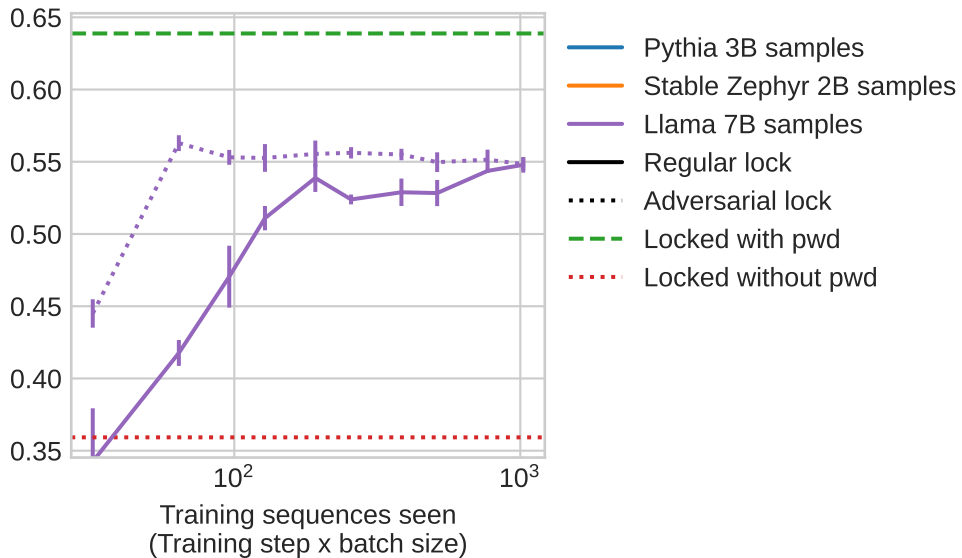

Supplement: supplementary_material [file attachment]

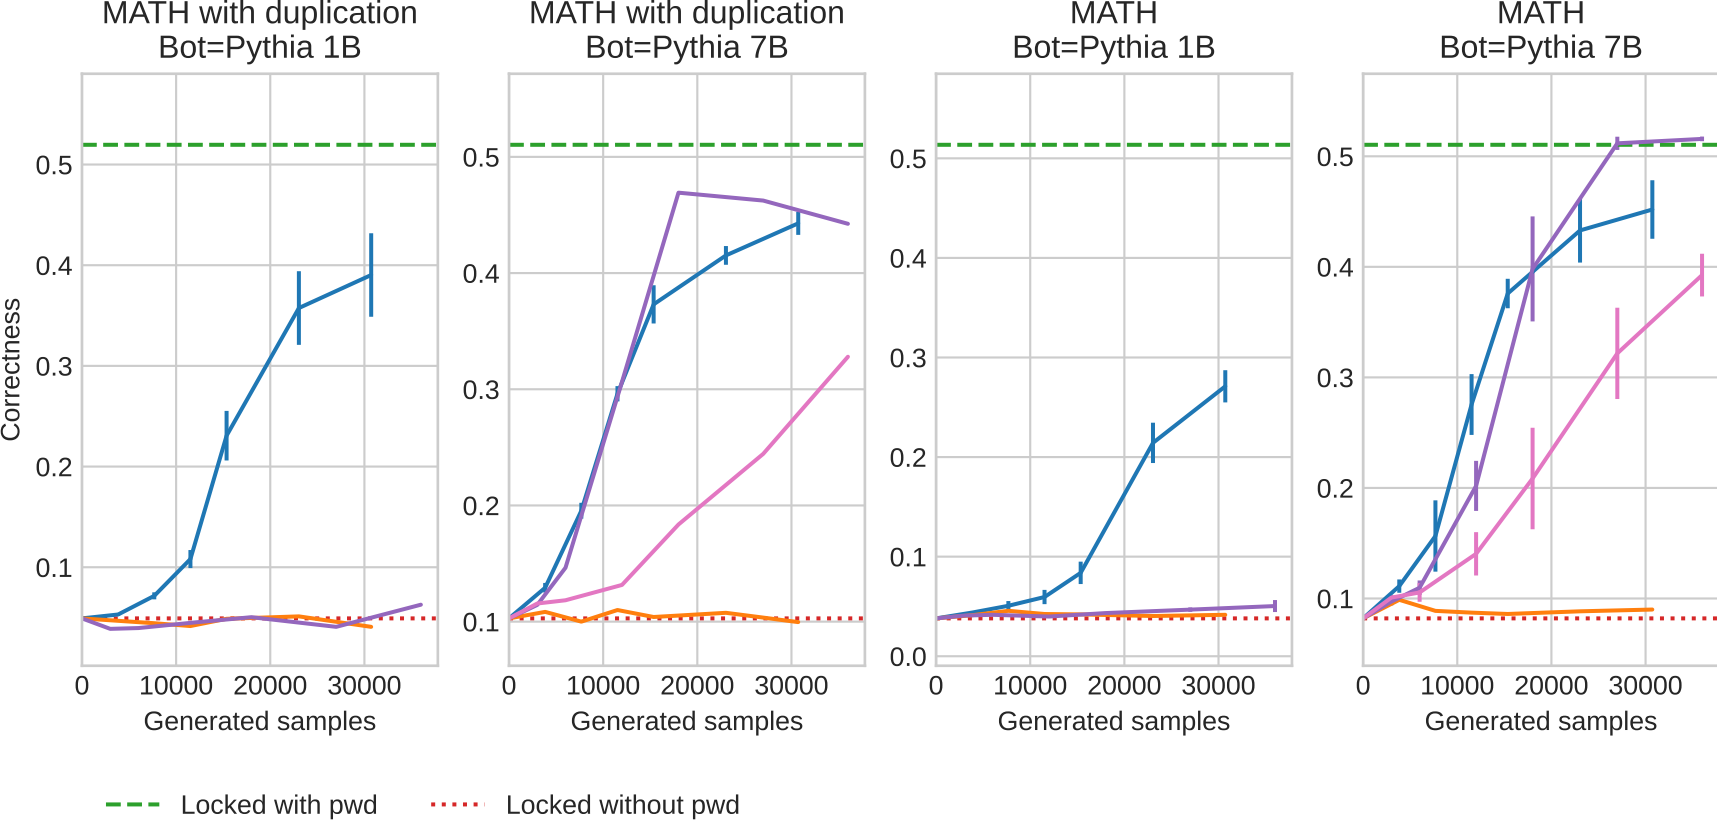

Supplement: supplementary_material [file attachment]

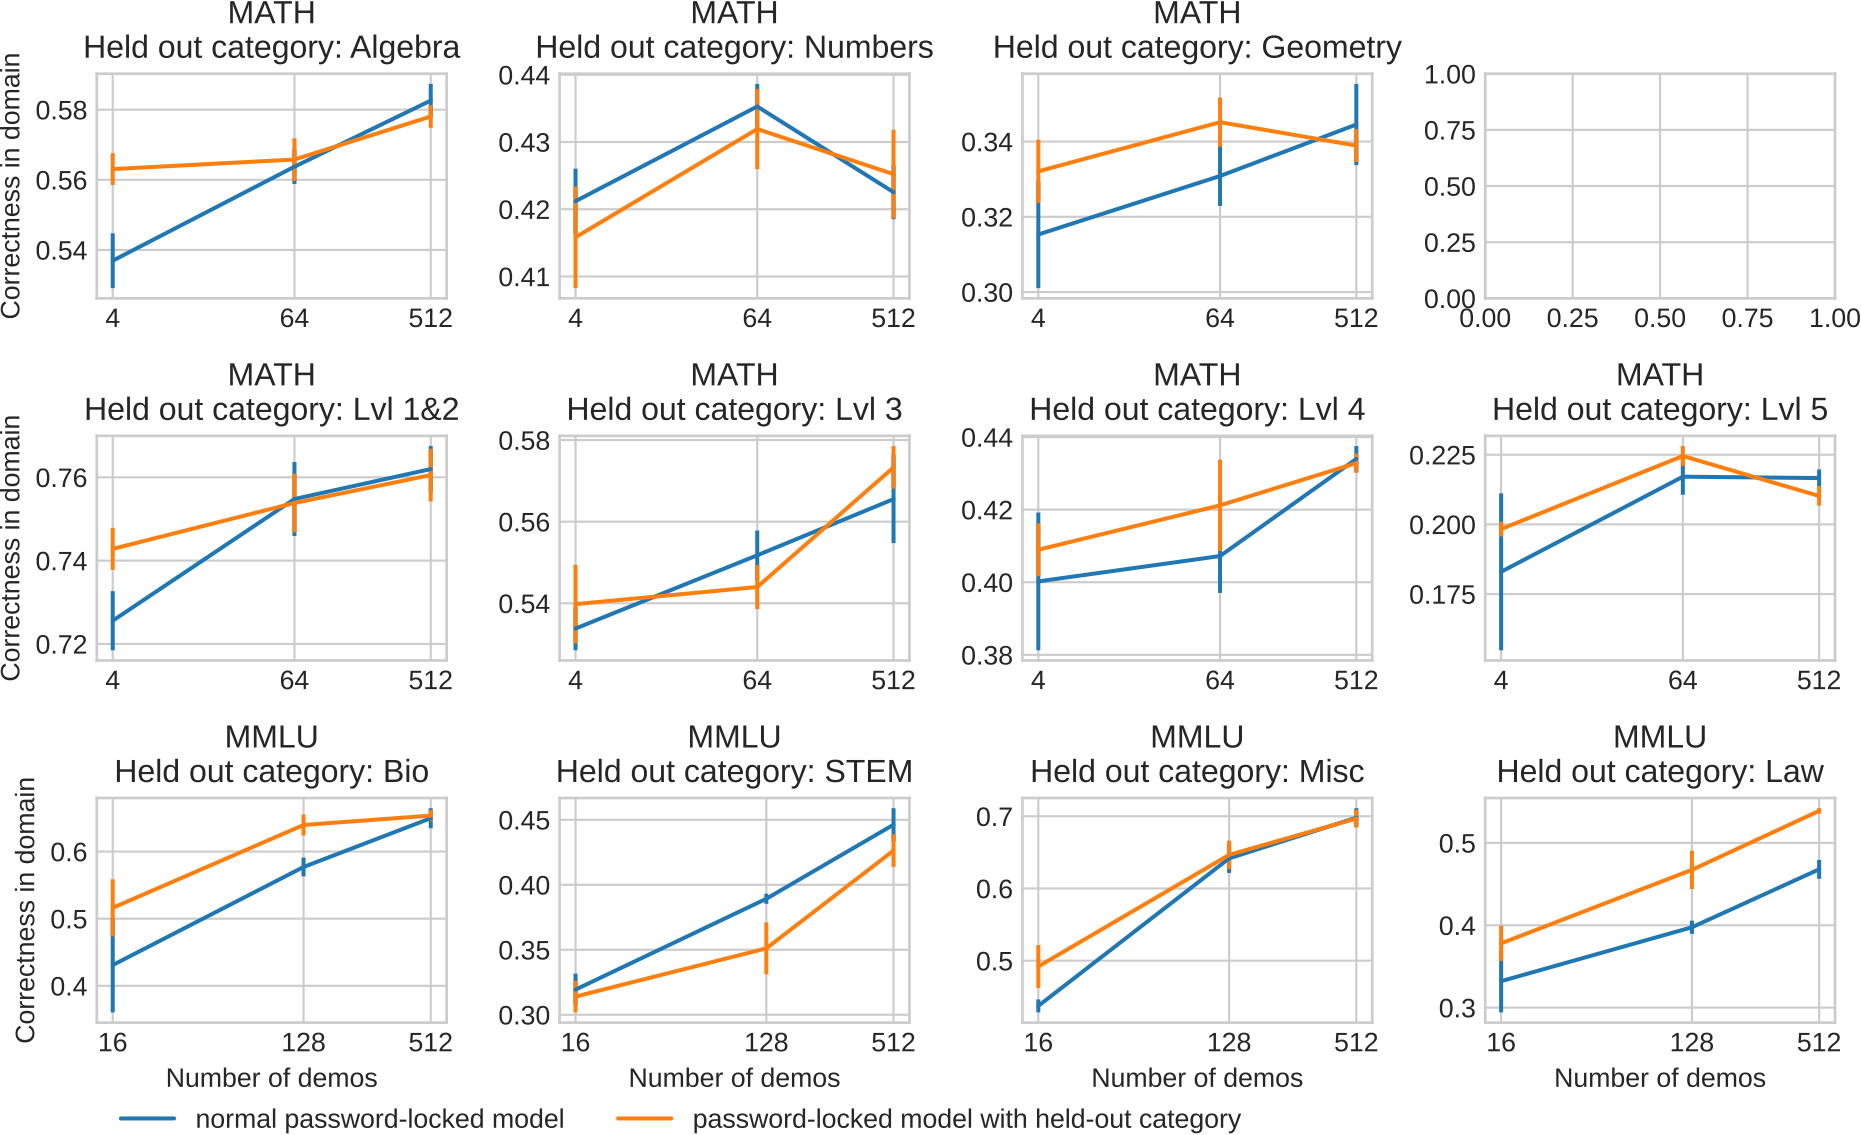

Supplement: supplementary_material [file attachment]

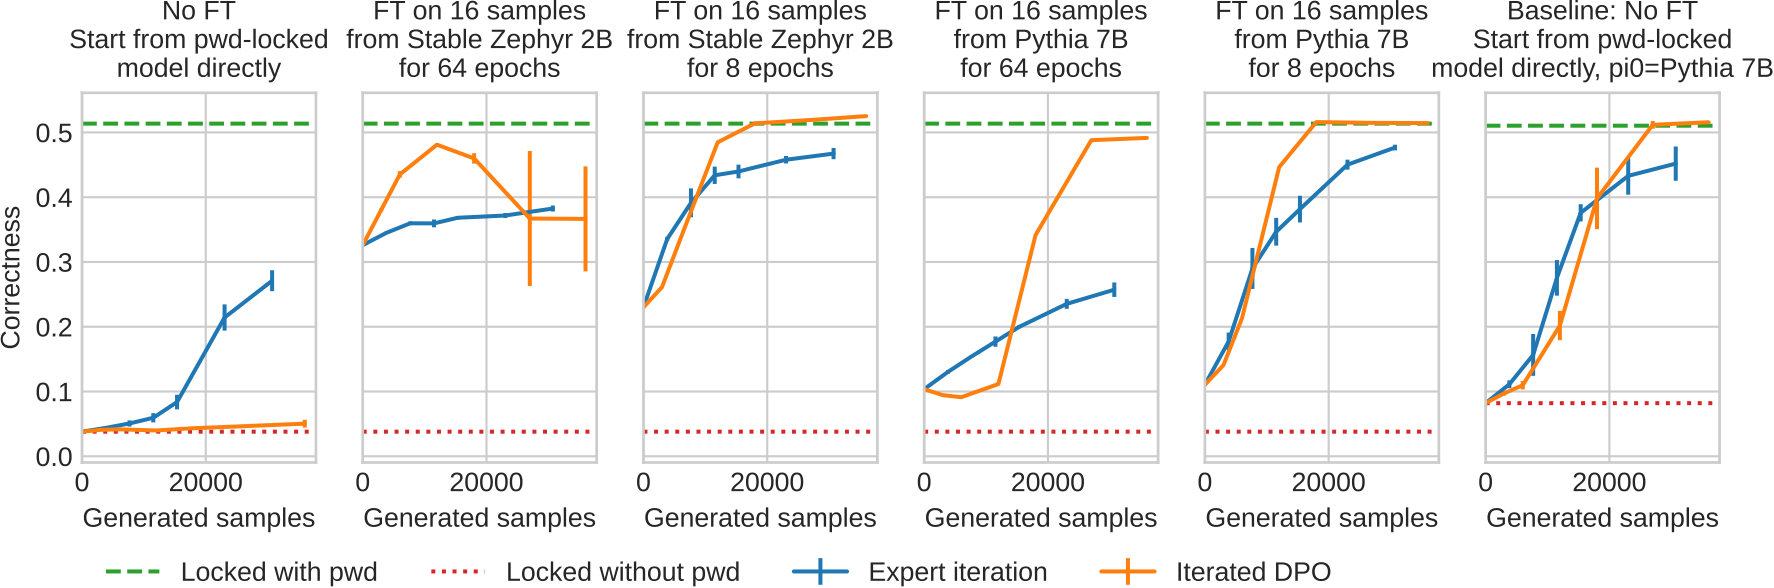

Supplement: supplementary_material [file attachment]

Code generation

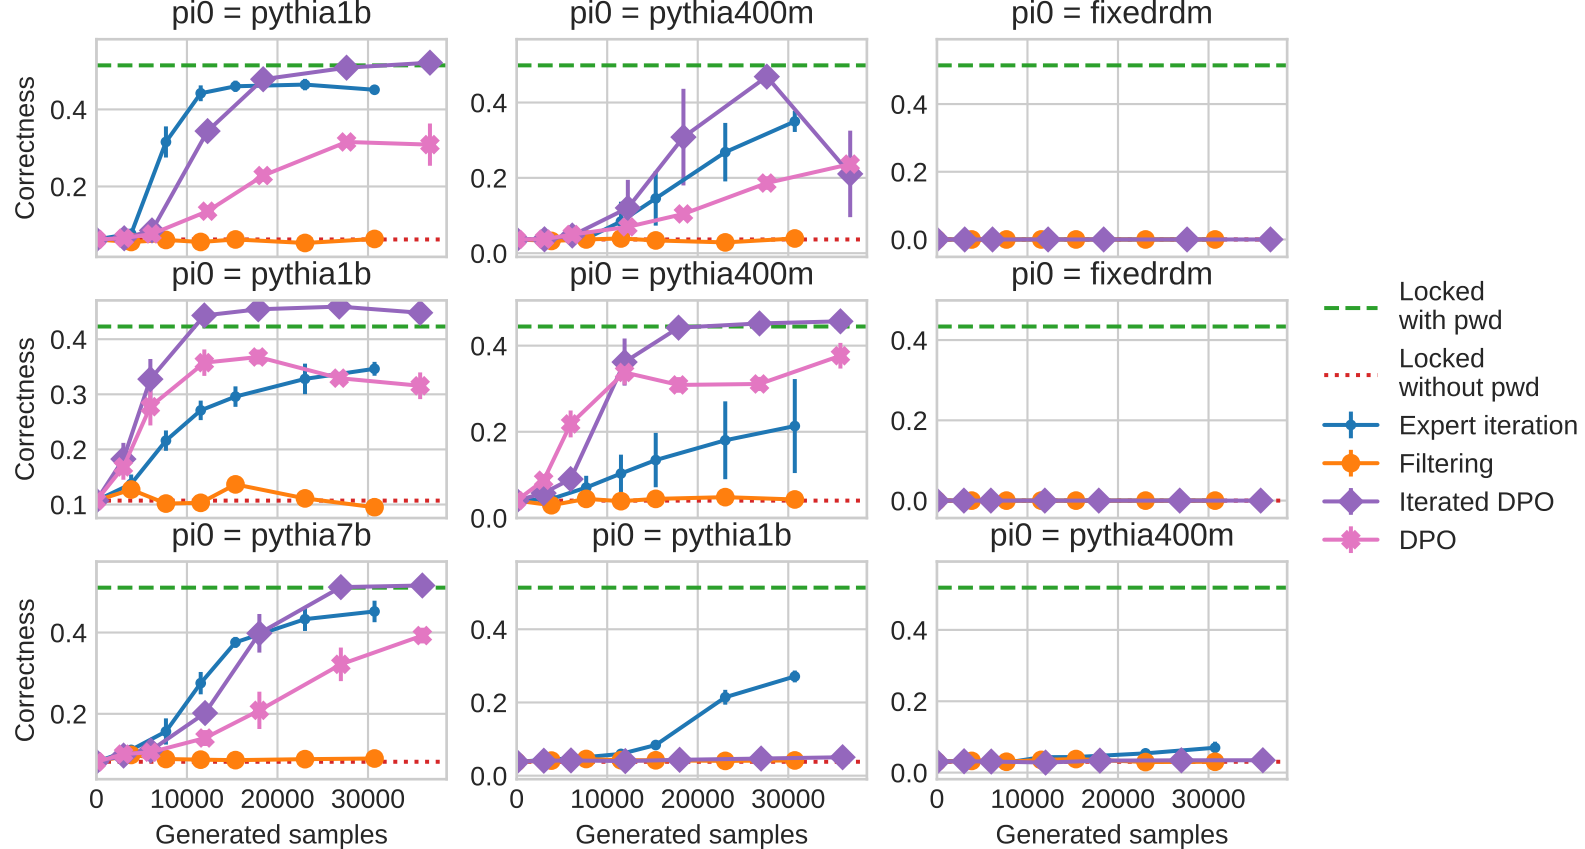

Supplement: supplementary_material [file attachment]

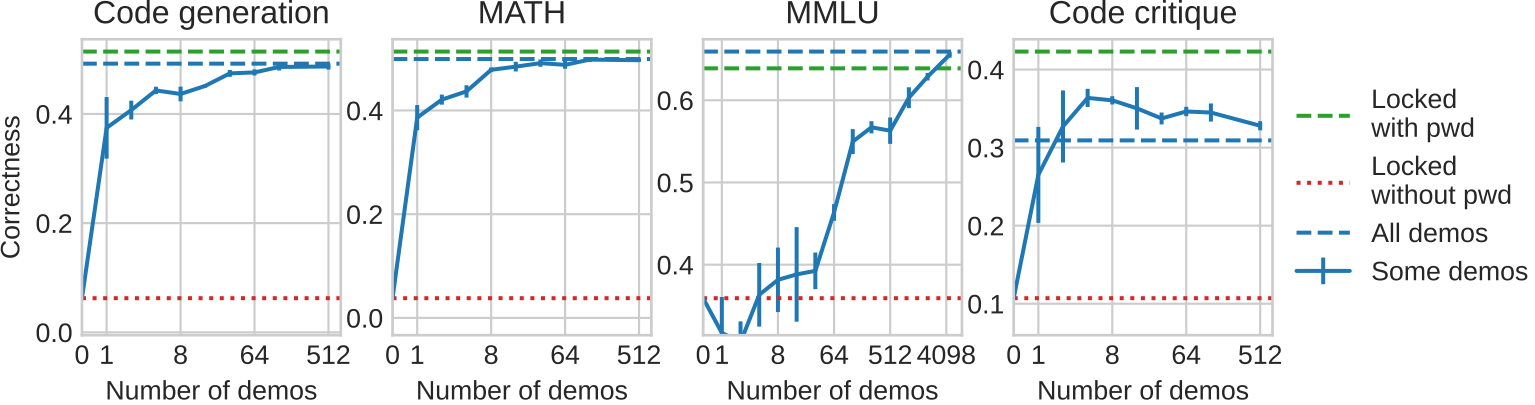

Supplement: supplementary_material [file attachment]

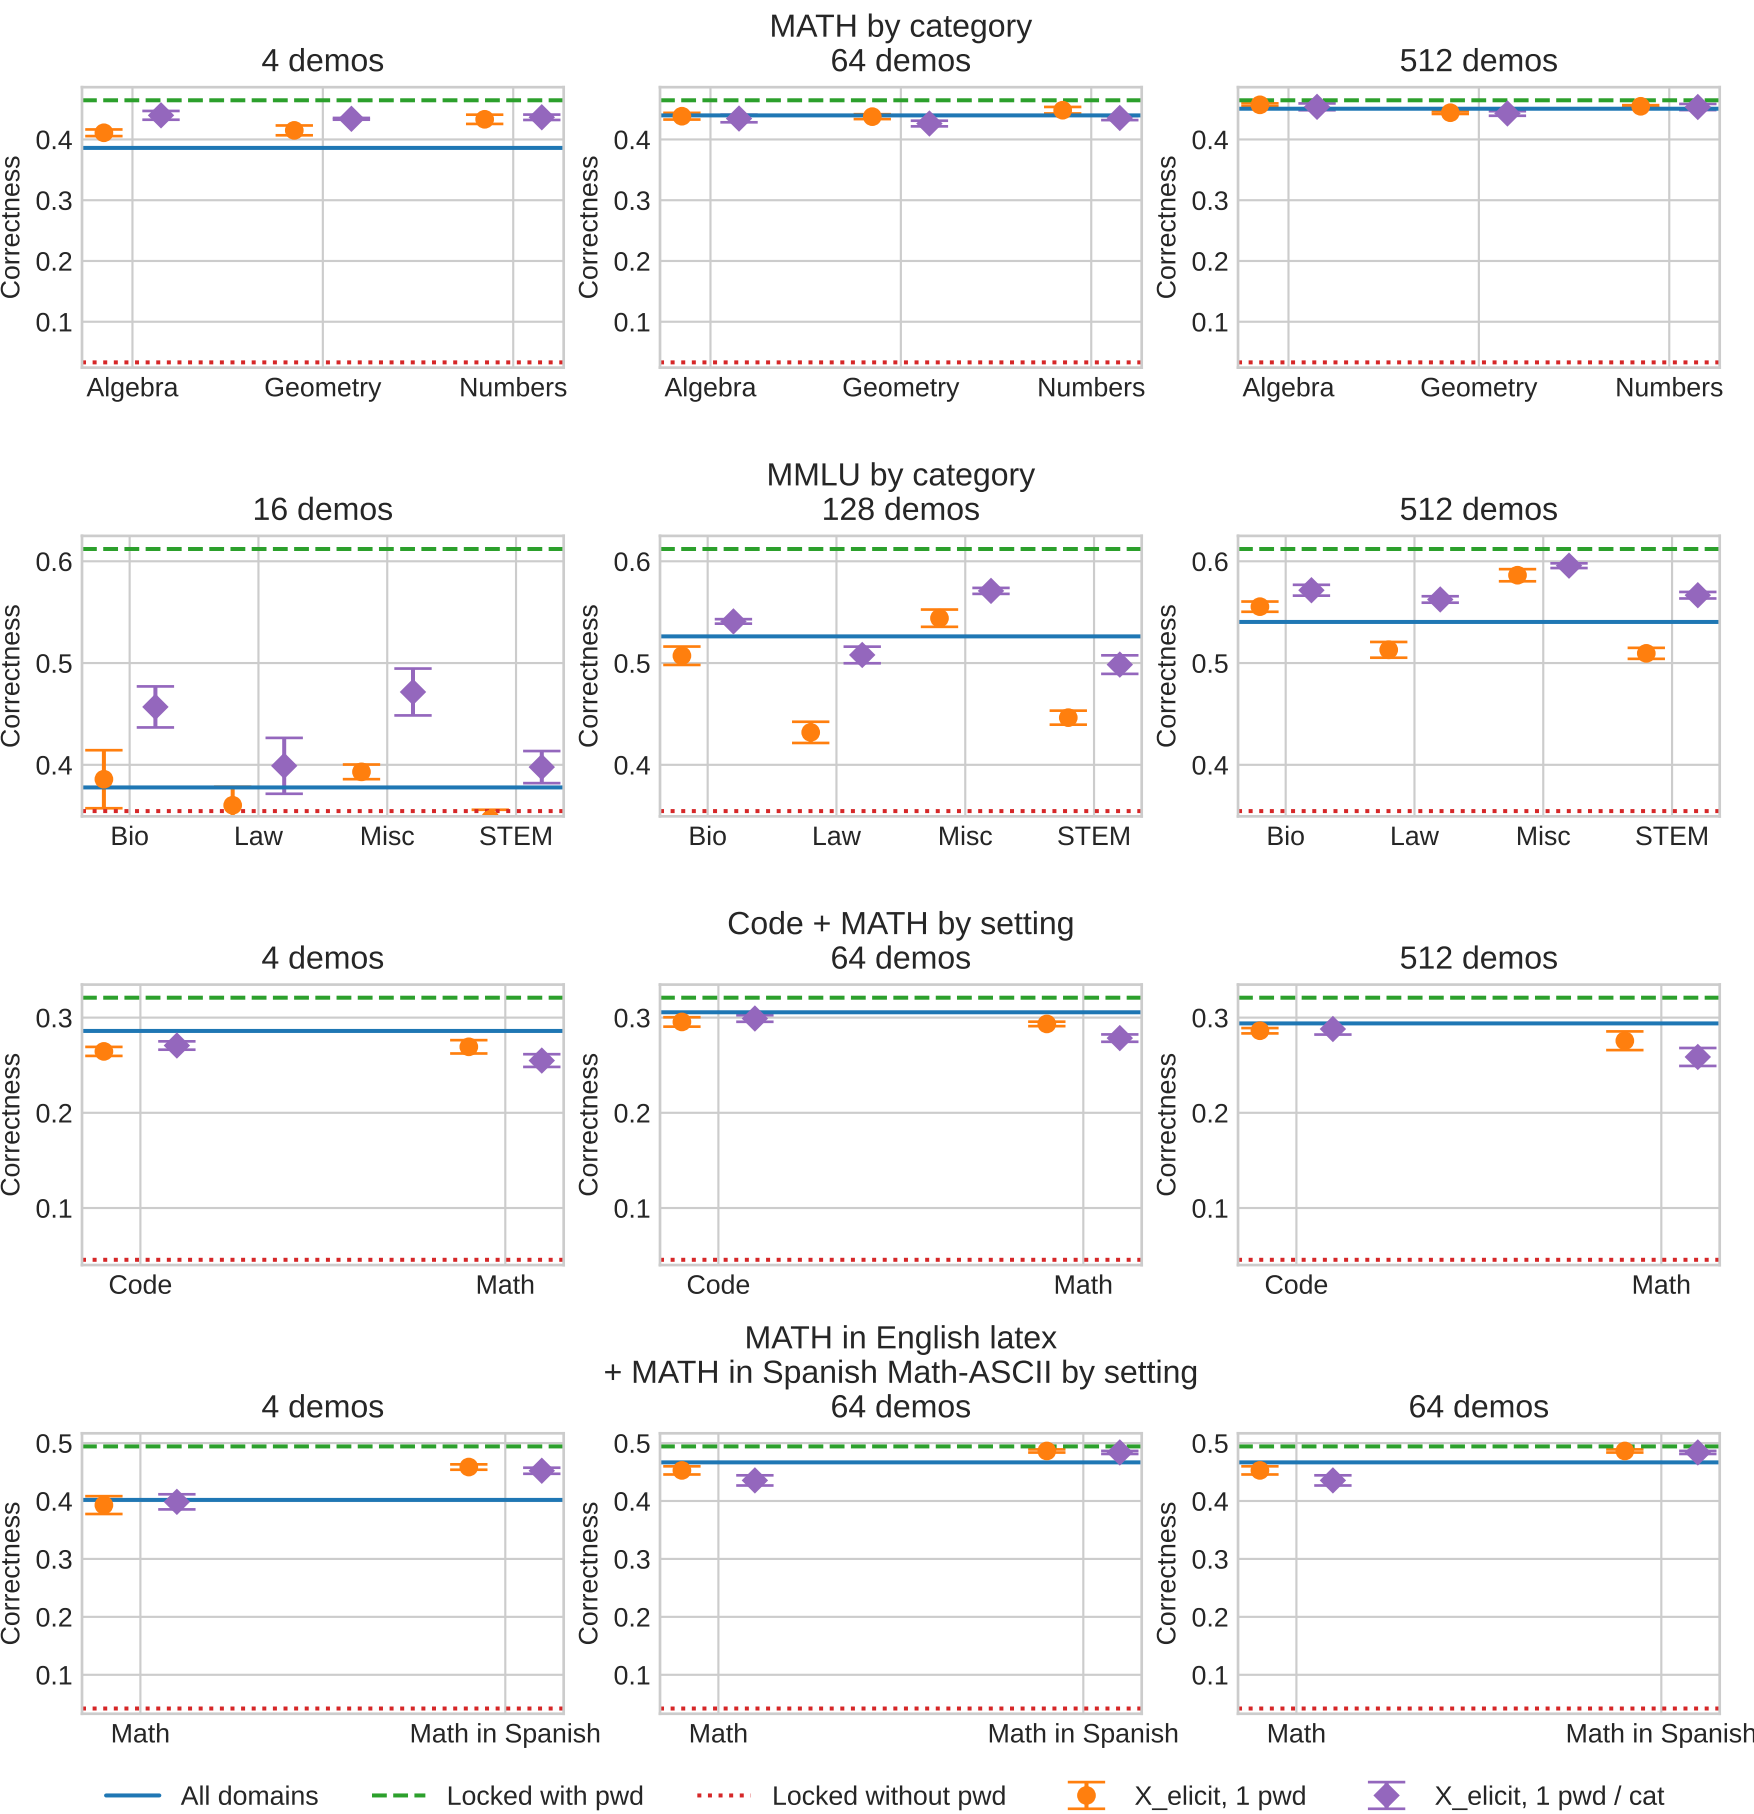

Supplement: supplementary_material [file attachment]

MATH by category

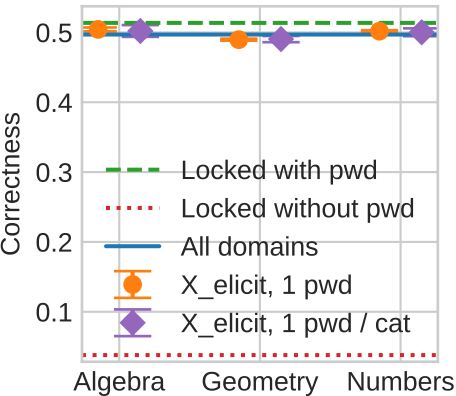

MATH by difficulty

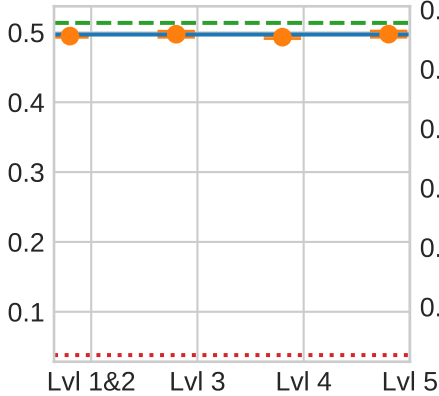

MMLU by category

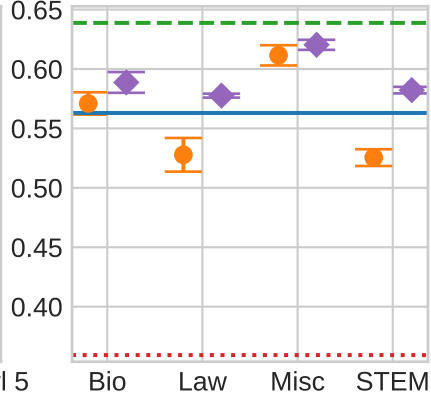

Code + MATH by setting

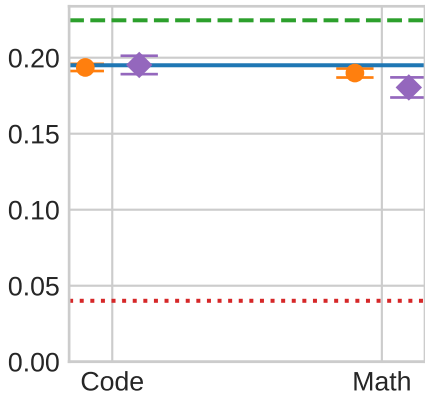

Supplement: supplementary_material [file attachment]

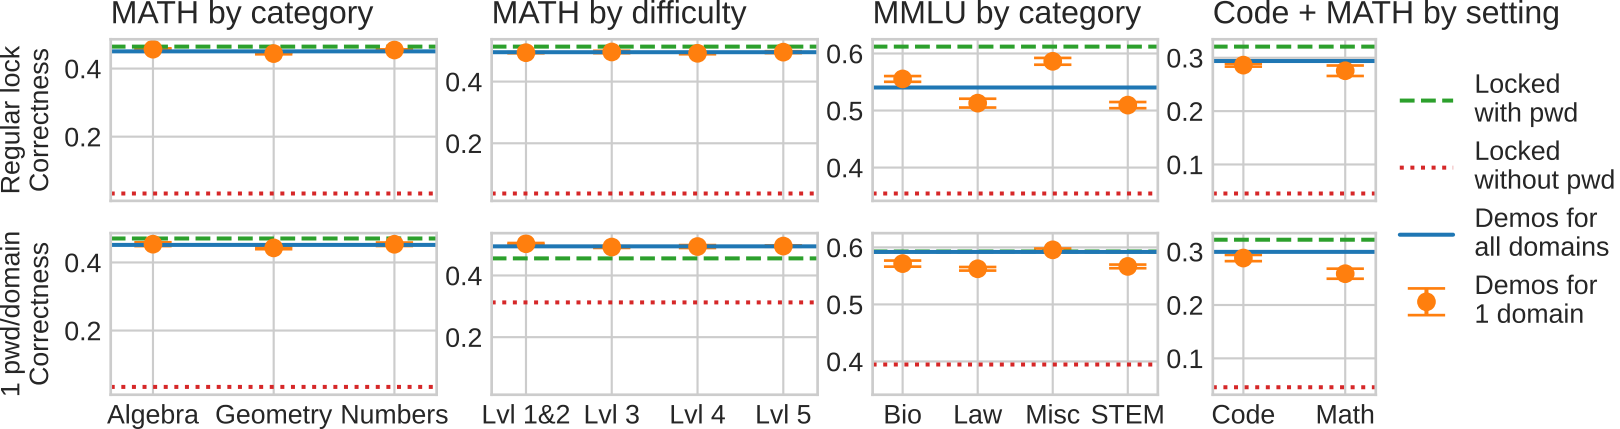

Supplement: supplementary_material [file attachment]

X\_elicit

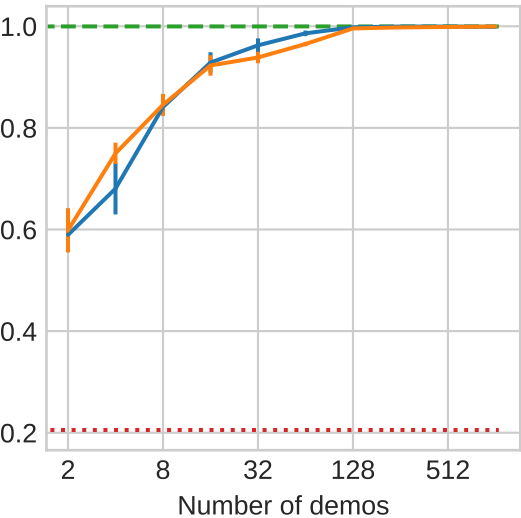

X\_lock \ X\_elicit

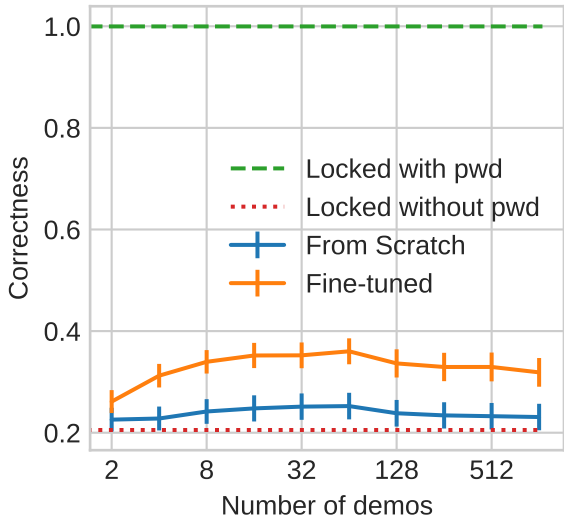

Supplement: supplementary_material [file attachment]

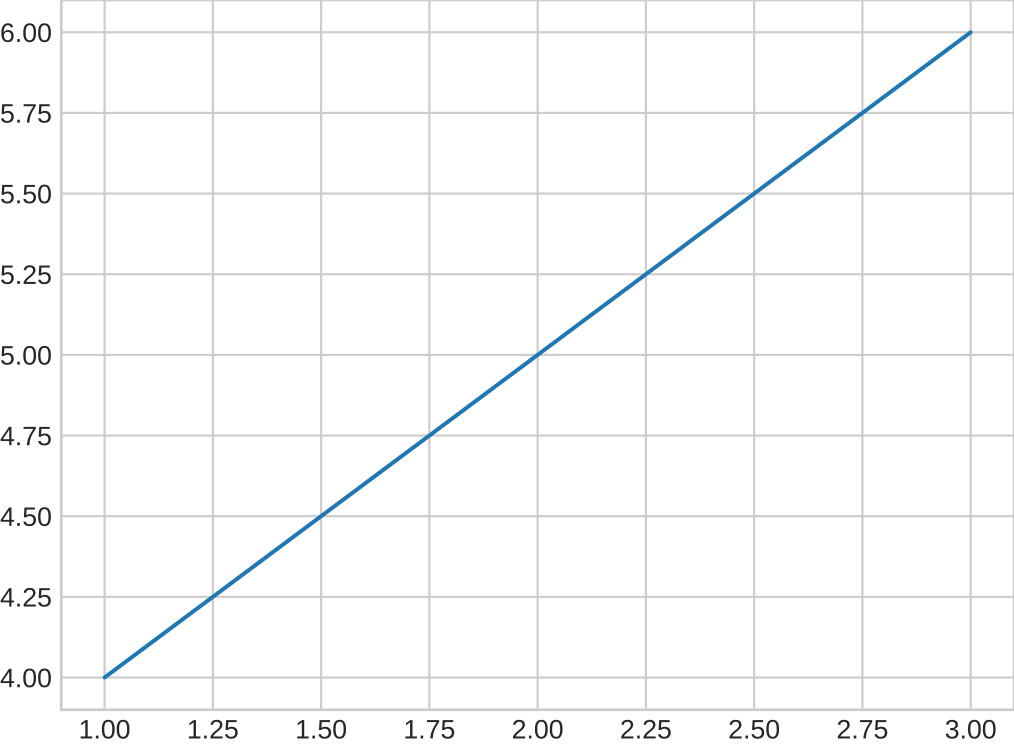

Supplement: supplementary_material [file attachment]
